# Supplementary material for: Antimicrobial Resistance Situational Analysis 2019–2020: Design and Performance for Human Health Surveillance in Uganda
Source: MDPI journal article supplement (doi:10.3390/tropicalmed6040178), 2021-09-29
Supplement: s1 [file s1]

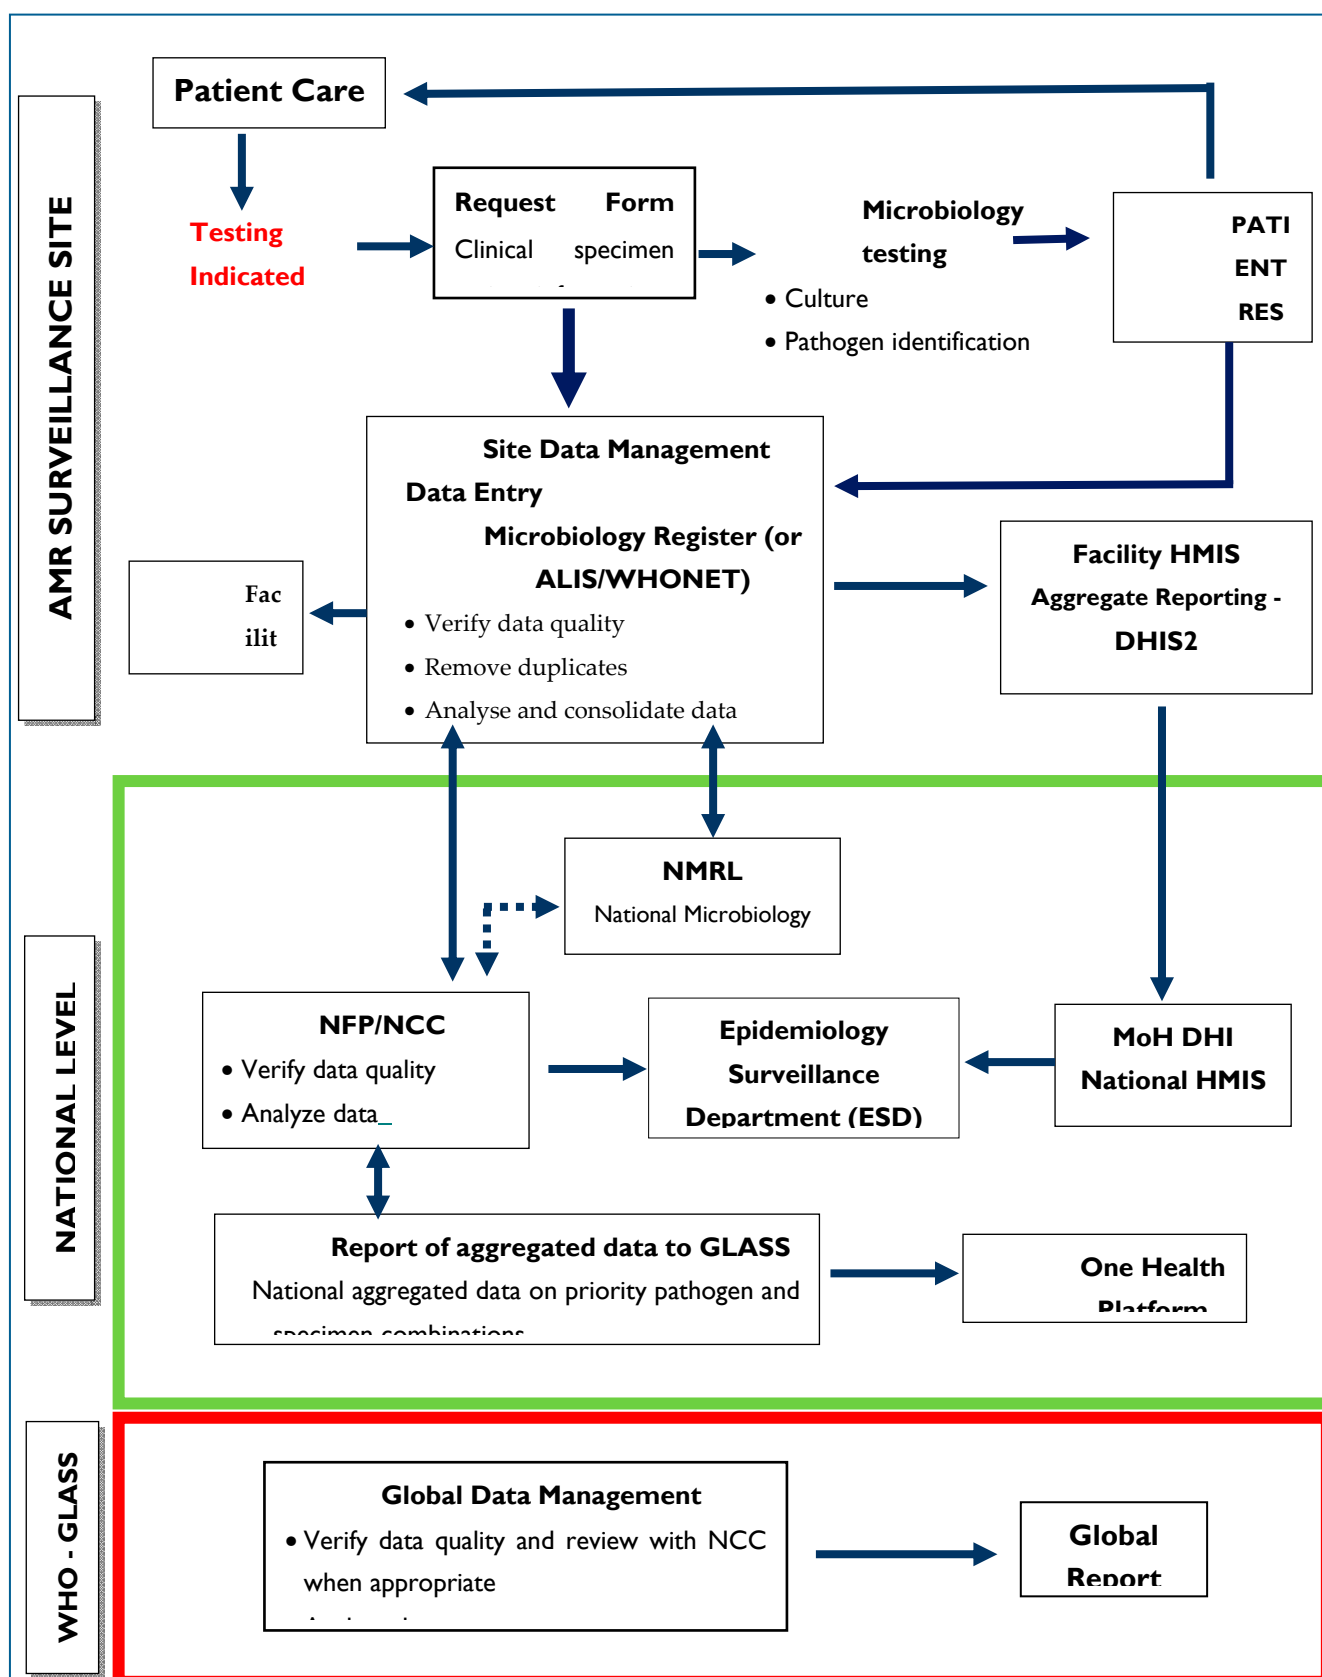

## Concept for AMR Surveillance data / information flow

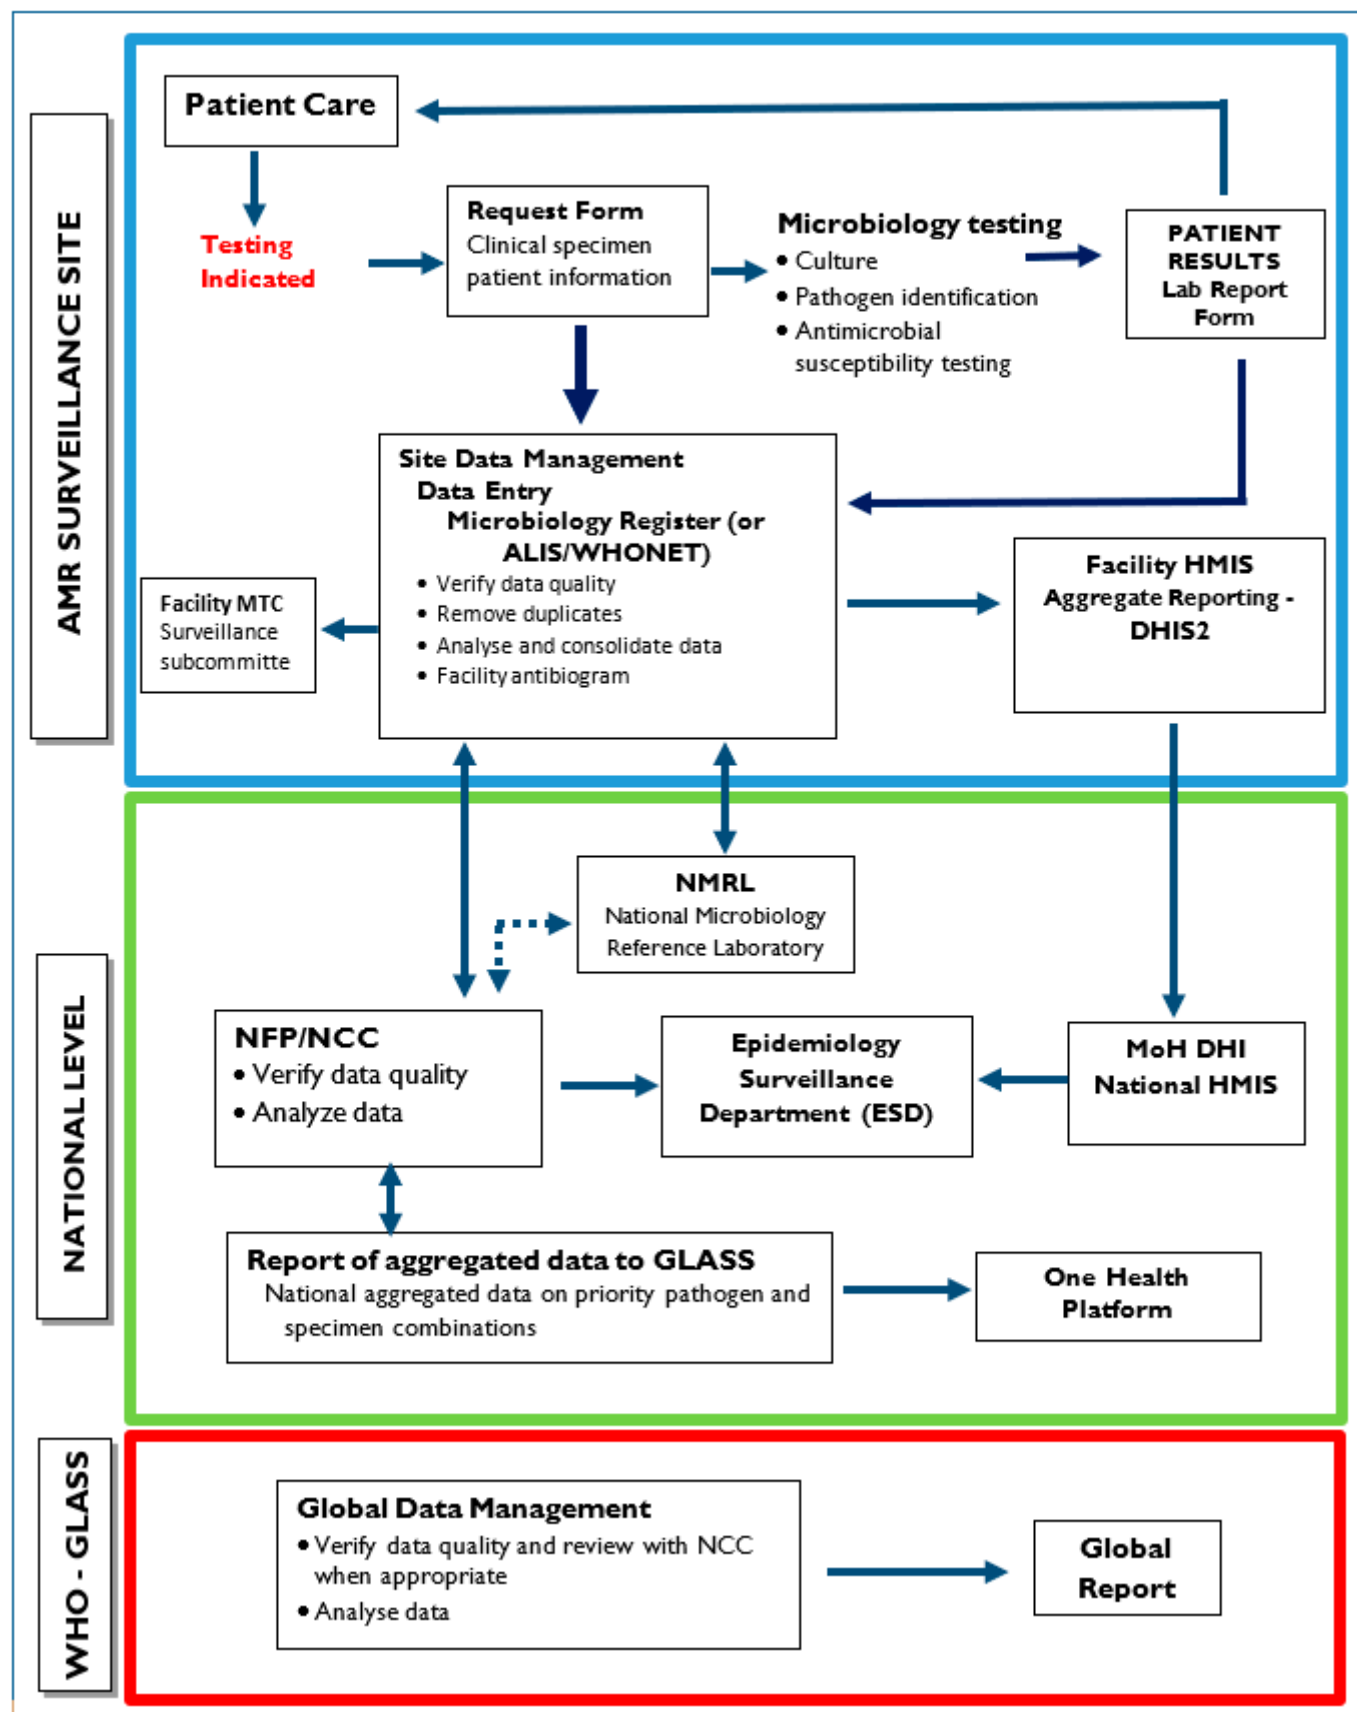

Figure S1. How samples and data are captured from the surveillance sites.

Table S1. National Microbiology Laboratory Request and Results Reporting Form.

# National Microbiology Laboratory Request and Results Reporting Form

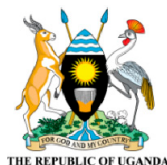

## MINISTRY OF HEALTH

### NATIONAL MICROBIOLOGY LABORATORY REQUEST AND REPORT FORM

Form Serial Number

#### 1. Facility Information

|                                                                                                                                  |                                                                                                                 |                                                                                                                                                                    |
|----------------------------------------------------------------------------------------------------------------------------------|-----------------------------------------------------------------------------------------------------------------|--------------------------------------------------------------------------------------------------------------------------------------------------------------------|
| Facility Code:<<auto selection of facility code from a drop down menu of facility codes from master facility list>>              |                                                                                                                 | Facility Name:<<auto selection of facility name from a drop down menu of facility names from master facility list>>                                                |
| Facility Ownership:<<auto selection of facility ownership from a drop down menu comprising: Public, PHP, PNFP, Other (Specify)>> |                                                                                                                 | Facility Level:<<auto selection of facility level from a drop down menu comprising: Public: NRHL, RRHL, GHL, HC4L, HC3L>>, << Private: Level 3, Level 2, Level 1>> |
| District Code:<<auto selection of district code from a drop down menu of district codes from MOLG district list>>                | District Name:<<auto selection of district name from drop down menu of district names from MOLG district list>> | Health Region:<<auto selection from a drop down menu comprising the list of health regions>>                                                                       |

#### 2. Information on Requesting Officer

|                           |              |                                                                                                                              |            |
|---------------------------|--------------|------------------------------------------------------------------------------------------------------------------------------|------------|
| Surname:                  | Other names: | Cadre: <<drop down menu containing: medical officer, clinical officer, nurse, public health officer, Other (specify) .....>> | Signature: |
| Telephone:                |              | Email address:                                                                                                               |            |
| Date of request: DD/MM/YY |              | Time of request: HH:MM                                                                                                       |            |

#### 3. Patient Information

|                                                           |                                                     |                                                                                                                  |                                                           |                                                                                                                                           |                                                          |
|-----------------------------------------------------------|-----------------------------------------------------|------------------------------------------------------------------------------------------------------------------|-----------------------------------------------------------|-------------------------------------------------------------------------------------------------------------------------------------------|----------------------------------------------------------|
| Patient National Identification Number (NIN):             |                                                     | OPD/Health Facility Number(for patients without a NIN, or facilities that do not use NIN as patient identifier): |                                                           | Unique Laboratory Identification Number (ULIN):<<field format: facility code-patient initials (4 letters max)-lab auto generated number>> |                                                          |
| Surname:                                                  | Other names:                                        | Date of Birth: DD/MM/YY                                                                                          |                                                           | Age: <<age calculator: for only patient who don't know date of birth that automatically calculates it>>                                   |                                                          |
| Sex:<<Male, Female>>                                      | Occupation:                                         | Telephone Number(s):                                                                                             |                                                           | Email address:                                                                                                                            |                                                          |
| <b>Residence details</b>                                  |                                                     |                                                                                                                  | <b>Work place details</b>                                 |                                                                                                                                           |                                                          |
| District:<<drop down menu comprising: list of districts>> | Sub county:<<drop down menu comprising: list of sub | Village: <<drop down menu comprising: list of villages within a                                                  | District:<<drop down menu comprising: list of districts>> | Sub county:<<drop down menu comprising: list of sub counties within a                                                                     | Village:<<drop down menu comprising: list of districts>> |

|                                   |                                                     |                                     |  |                                               |  |
|-----------------------------------|-----------------------------------------------------|-------------------------------------|--|-----------------------------------------------|--|
|                                   | <i>counties within a specified district&gt;&gt;</i> | <i>specified sub county&gt;&gt;</i> |  | <i>specified district&gt;&gt;</i>             |  |
| Surname of Patient's Next of Kin: |                                                     | Other names:                        |  | Telephone Number(s) of Patient's Next of Kin: |  |
| Name of Ward/Specialized Clinic:  |                                                     |                                     |  |                                               |  |

#### 4. Clinical Information(tick where applicable)

|                                                                                                                                                                                                    |                                                                                                                                                                                                                                                                                  |                                                                                                                                                                      |                                                                                                                                                                                                                                                                        |                                                                                                                                                                         |                                                   |
|----------------------------------------------------------------------------------------------------------------------------------------------------------------------------------------------------|----------------------------------------------------------------------------------------------------------------------------------------------------------------------------------------------------------------------------------------------------------------------------------|----------------------------------------------------------------------------------------------------------------------------------------------------------------------|------------------------------------------------------------------------------------------------------------------------------------------------------------------------------------------------------------------------------------------------------------------------|-------------------------------------------------------------------------------------------------------------------------------------------------------------------------|---------------------------------------------------|
| <input type="checkbox"/> Major Clinical Signs and Symptoms                                                                                                                                         | <input type="checkbox"/> Fever<br><input type="checkbox"/> Vomiting<br><input type="checkbox"/> Nausea<br><input type="checkbox"/> Diarrhoea                                                                                                                                     | <input type="checkbox"/> Abdominal pain<br><input type="checkbox"/> Headache<br><input type="checkbox"/> Loss of appetite<br><input type="checkbox"/> Conjunctivitis | <input type="checkbox"/> Sore throat<br><input type="checkbox"/> Rash<br><input type="checkbox"/> Constipation<br><input type="checkbox"/> Night Sweats                                                                                                                | Persistent Cough<br><input type="checkbox"/> Bloody Stools<br><input type="checkbox"/> Enlargement of glands<br><input type="checkbox"/> Bleeding through Body Openings | <input type="checkbox"/> Other symptoms (specify) |
| Hospitalized for more than 2 calendar days? Y/N                                                                                                                                                    |                                                                                                                                                                                                                                                                                  |                                                                                                                                                                      |                                                                                                                                                                                                                                                                        |                                                                                                                                                                         |                                                   |
| Patient transferred from another health facility? Y/N                                                                                                                                              |                                                                                                                                                                                                                                                                                  |                                                                                                                                                                      | If YES, Name facility that has transferred patient:                                                                                                                                                                                                                    |                                                                                                                                                                         |                                                   |
| Has the patient been on antibiotics during current infection?                                                                                                                                      | <input type="checkbox"/> YES                                                                                                                                                                                                                                                     | If YES, specify drugs administered to patient :<< drop down with: antimicrobials administered, Other (specify) .....>>                                               |                                                                                                                                                                                                                                                                        |                                                                                                                                                                         | Duration on drugs: .....days                      |
|                                                                                                                                                                                                    | <input type="checkbox"/> NO                                                                                                                                                                                                                                                      |                                                                                                                                                                      |                                                                                                                                                                                                                                                                        |                                                                                                                                                                         |                                                   |
| <b>Provisional diagnosis/disease suspected (tick all options that apply)</b>                                                                                                                       |                                                                                                                                                                                                                                                                                  |                                                                                                                                                                      |                                                                                                                                                                                                                                                                        |                                                                                                                                                                         |                                                   |
| <b>4.1. Epidemic prone diseases</b>                                                                                                                                                                |                                                                                                                                                                                                                                                                                  |                                                                                                                                                                      |                                                                                                                                                                                                                                                                        |                                                                                                                                                                         |                                                   |
| <input type="checkbox"/> Cholera<br><input type="checkbox"/> Anthrax<br><input type="checkbox"/> Measles                                                                                           | <input type="checkbox"/> SARI<br><input type="checkbox"/><br><input type="checkbox"/> Yellow fever<br><input type="checkbox"/> Typhoid fever                                                                                                                                     | <input type="checkbox"/> Brucella<br><input type="checkbox"/> Dengue<br><input type="checkbox"/> Plague                                                              | <input type="checkbox"/><br><input type="checkbox"/> Diarrhoea with blood (Shigella Dysentery)<br><input type="checkbox"/> Chikungunya<br><input type="checkbox"/> Meningococcal meningitis                                                                            | <input type="checkbox"/> Acute Haemorrhagic Fever syndrome (Ebola, Marburg, Rift Valley, Lassa, Crimean Congo, West Nile Fever)                                         |                                                   |
| <b>4.2. Diseases targeted for eradication or elimination</b>                                                                                                                                       |                                                                                                                                                                                                                                                                                  |                                                                                                                                                                      | <b>4.3. Diseases or events of international concern</b>                                                                                                                                                                                                                |                                                                                                                                                                         |                                                   |
| Buruli ulcer<br><input type="checkbox"/> Neonatal tetanus<br><input type="checkbox"/> Leprosy<br><input type="checkbox"/> Noma                                                                     | <input type="checkbox"/> Onchocerciasis<br><input type="checkbox"/> Dracunculiasis<br><input type="checkbox"/> Lymphatic filariasis<br><input type="checkbox"/> Poliomyelitis                                                                                                    | <input type="checkbox"/><br><input type="checkbox"/> Smallpox<br><input type="checkbox"/> SARS<br><input type="checkbox"/> Human influenza due to a new subtype      |                                                                                                                                                                                                                                                                        | <input type="checkbox"/> Other public health event of inter (national) concern (infectious, zoonotic, food borne, chemical, radio nuclear, or due to unknown condition) |                                                   |
| <b>4.4. Other major diseases, events or conditions of public health importance</b>                                                                                                                 |                                                                                                                                                                                                                                                                                  |                                                                                                                                                                      |                                                                                                                                                                                                                                                                        |                                                                                                                                                                         |                                                   |
| <input type="checkbox"/> Trypanosomiasis<br><input type="checkbox"/> Diabetes mellitus<br><input type="checkbox"/> Rabies<br><input type="checkbox"/> Malaria<br><input type="checkbox"/> Maternal | <input type="checkbox"/> Trachoma<br><input type="checkbox"/> STIs<br><input type="checkbox"/> Tuberculosis<br><input type="checkbox"/> Acute viral hepatitis<br><input type="checkbox"/> Mental health (Epilepsy)<br><input type="checkbox"/> Injuries (Road traffic Accidents) |                                                                                                                                                                      | <input type="checkbox"/> HIV/AIDS (new cases)<br><input type="checkbox"/> Severe pneumonia less than 5 years of age<br><input type="checkbox"/> Malnutrition in children under 5 years of age<br><input type="checkbox"/> Adverse events following immunization (AEFI) |                                                                                                                                                                         |                                                   |

|                                                 |                                                                                                                           |
|-------------------------------------------------|---------------------------------------------------------------------------------------------------------------------------|
| deaths<br><input type="checkbox"/> Hypertension | <input type="checkbox"/> Diarrhoea with dehydration less than 5 years of age<br><input type="checkbox"/> Others (specify) |
|-------------------------------------------------|---------------------------------------------------------------------------------------------------------------------------|

## 5. Specimen Information

| Tick the type of specimen                                                                                                                                                                                                                           |                                                                                                                                                                                                                                                                |                                                                                                                                                                                                                                                                                                                                             |                                                                                                                                                                                                                                                                                     |                                                                                                                                                                                                                                                                                                                                                              |                                                                                                                                                                                                                                                                                           |
|-----------------------------------------------------------------------------------------------------------------------------------------------------------------------------------------------------------------------------------------------------|----------------------------------------------------------------------------------------------------------------------------------------------------------------------------------------------------------------------------------------------------------------|---------------------------------------------------------------------------------------------------------------------------------------------------------------------------------------------------------------------------------------------------------------------------------------------------------------------------------------------|-------------------------------------------------------------------------------------------------------------------------------------------------------------------------------------------------------------------------------------------------------------------------------------|--------------------------------------------------------------------------------------------------------------------------------------------------------------------------------------------------------------------------------------------------------------------------------------------------------------------------------------------------------------|-------------------------------------------------------------------------------------------------------------------------------------------------------------------------------------------------------------------------------------------------------------------------------------------|
| <input type="checkbox"/> Sputum<br><input type="checkbox"/> Vomitus<br><input type="checkbox"/> Urine<br><input type="checkbox"/> CSF<br><input type="checkbox"/> Stool<br><input type="checkbox"/> Wound<br><input type="checkbox"/> Bever-<br>age | <input type="checkbox"/> Food re-<br>mains<br><input type="checkbox"/> Water<br><input type="checkbox"/> Eye swab<br><input type="checkbox"/> Vaginal<br>Aspirate<br><input type="checkbox"/> Se-<br>rum/plasma<br><input type="checkbox"/> Blood cul-<br>ture | <input type="checkbox"/> Gastric<br><input type="checkbox"/> Scalp<br><input type="checkbox"/> Biopsy/tissue<br><input type="checkbox"/> Skin<br><input type="checkbox"/> snip/nail/hair<br><input type="checkbox"/> Abscess/pus<br><input type="checkbox"/> swab<br><input type="checkbox"/> Sinus<br><input type="checkbox"/> Bone marrow | <input type="checkbox"/> Nasal washing<br><input type="checkbox"/> Rectal<br><input type="checkbox"/> Urethral<br><input type="checkbox"/> Nasopharynx<br>(NP)<br><input type="checkbox"/> Bronchial brush<br><input type="checkbox"/> Throat<br><input type="checkbox"/> Dialysate | <input type="checkbox"/> Vitreous<br><input type="checkbox"/> Bronchial wash<br><input type="checkbox"/><br><input type="checkbox"/> Catheter Urine<br><input type="checkbox"/> Environmental sam-<br>ple<br><input type="checkbox"/> Veterinary Speci-<br>men<br><input type="checkbox"/> Urethral Secretion<br><input type="checkbox"/> Cervical Secretion | <input type="checkbox"/> Synovial Fluid<br><input type="checkbox"/> Bronchoalveolar<br>lavage<br><input type="checkbox"/> Mucocutaneous<br><input type="checkbox"/> Urine – Suprapubic<br><input type="checkbox"/> Transbronchial bi-<br>opsy<br><input type="checkbox"/> Other (specify) |
| Date of specimen col-<br>lection: DD/MM/YY                                                                                                                                                                                                          | Time of specimen<br>collection:<br>HH:MM                                                                                                                                                                                                                       | Date of specimen dispatch<br>to testing lab: DD/MM/YY                                                                                                                                                                                                                                                                                       | Time of specimen dispatch to testing lab:<br>HH:MM                                                                                                                                                                                                                                  |                                                                                                                                                                                                                                                                                                                                                              |                                                                                                                                                                                                                                                                                           |
| Surname of officer<br>receiving specimen in<br>testing lab:                                                                                                                                                                                         | Other names of<br>officer receiving<br>specimen in test-<br>ing lab:                                                                                                                                                                                           | Date when specimen is<br>received in testing lab:<br>DD/MM/YY                                                                                                                                                                                                                                                                               | Time when specimen is received in test-<br>ing lab: HH:MM                                                                                                                                                                                                                           |                                                                                                                                                                                                                                                                                                                                                              |                                                                                                                                                                                                                                                                                           |

### 5.1. Type of Test Requested

| Examination required:                                  |              |          |              |
|--------------------------------------------------------|--------------|----------|--------------|
| Indicate the requested test from the type of specimen. |              |          |              |
| Specimen                                               | Test request | Specimen | Test Request |
|                                                        |              |          |              |

## 6. Receiving specified lab

| Details of receiving officer at reference/specialized lab |                          |        |  |
|-----------------------------------------------------------|--------------------------|--------|--|
| Surname:                                                  | Other names:             | Cadre: |  |
| Telephone:                                                | Email address:           |        |  |
| Date of receiving: DD/MM/YY                               | Time of receiving: HH:MM |        |  |

## 7. Specimen Quality (to be filled by ONLY LABORATORY PERSONNEL at receiving laboratory)

|                                                                  |                                                                                                                                                                          |                                                                                                                                                                                                                                                                    |                                                                                                                                                                                                      |                                          |
|------------------------------------------------------------------|--------------------------------------------------------------------------------------------------------------------------------------------------------------------------|--------------------------------------------------------------------------------------------------------------------------------------------------------------------------------------------------------------------------------------------------------------------|------------------------------------------------------------------------------------------------------------------------------------------------------------------------------------------------------|------------------------------------------|
| If specimen is<br>rejected, specify<br>reason for rejec-<br>tion | <input type="checkbox"/> Specimen without lab request<br>form<br><input type="checkbox"/> No sample label or identifier<br><input type="checkbox"/> Unclear sample label |                                                                                                                                                                                                                                                                    | <input type="checkbox"/> No test ordered on lab request form<br>of sample<br><input type="checkbox"/> Wrong sample label<br><input type="checkbox"/> Sample type unacceptable for re-<br>quired test | <input type="checkbox"/> Other (specify) |
|                                                                  | <input type="checkbox"/> Poor<br><input type="checkbox"/> Fair                                                                                                           | <input type="checkbox"/> Inadequate specimen volume<br><input type="checkbox"/> Inappropriate type of sample container<br><input type="checkbox"/> Inappropriate transport media of sample<br><input type="checkbox"/> Poor shipment condition (e.g., lack of cold | Delayed sample delivery time/too old<br>sample<br><input type="checkbox"/> Date of sample collection not specified<br><input type="checkbox"/> Time of sample collection not specified               |                                          |

|                   |                               |          |                                          |
|-------------------|-------------------------------|----------|------------------------------------------|
| where applicable) |                               | storage) | <input type="checkbox"/> Other (specify) |
|                   | <input type="checkbox"/> Good |          |                                          |

**National AMR Surveillance indicators** based on the national needs, both institutional and interventional. Among the institutional, these include the number of sites to perform microbiology C/S and the number of sites/lab reporting. The interventional needs refer to the resistance patterns and which organisms present with emerging resistance.

**Interventional indicators to be reported on monthly:** the volume of work being performed; what are the prevailing organisms; what are their sensitivity patterns and which organisms show emerging resistance

**Highlighted major resistances include:** prevalence of MRSA; 3<sup>rd</sup> generation cephalosporin resistance; carbapenem-resistant Enterobacteriaceae; vancomycin-resistant Enterococcus and colistin resistance.

**Institutional Indicators (to be reported quarterly include:** the number of sites performing culture and sensitivity testing, the sites are reporting their culture and sensitivity findings to NHLDS.

Specimen volume indicators include:

**Table S2.** National AMR Surveillance Indicators.

| SPECIMEN       | TOTAL<br>NO RE-<br>CEIVED | NO CUL-<br>TURED | NO RE-<br>JECTED (%) | SIGNIFICANT<br>GROWTH (%) | CONTAMINATION<br>(%) |
|----------------|---------------------------|------------------|----------------------|---------------------------|----------------------|
| Blood          |                           |                  |                      |                           |                      |
| Urine          |                           |                  |                      |                           |                      |
| Stool          |                           |                  |                      |                           |                      |
| CSF            |                           |                  |                      |                           |                      |
| Urethral swabs |                           |                  |                      |                           |                      |
| Cervical swabs |                           |                  |                      |                           |                      |
| Aspirates      |                           |                  |                      |                           |                      |
| Pus swabs      |                           |                  |                      |                           |                      |
| Other swabs    |                           |                  |                      |                           |                      |
| Sputum         |                           |                  |                      |                           |                      |
| Isolates       |                           |                  |                      |                           |                      |

## PATIENTS DEMOGRAPHICS

|                      | FEMALE | MALE |
|----------------------|--------|------|
| < 1 month            |        |      |
| 1 – 11 months        |        |      |
| 12 – 59 months       |        |      |
| 60 months – 11 years |        |      |
| 12 – 18 years        |        |      |
| > 18 – 30 years      |        |      |
| 31 – 45 years        |        |      |
| 45 – 65 years        |        |      |
| > 65 years           |        |      |

## HOSPITAL ACQUIRED AND COMMUNITY ACQUIRED INFECTIONS

|                               | % No of patients |
|-------------------------------|------------------|
| HOSPITAL ACQUIRED INFECTIONS  |                  |
| COMMUNITY ACQUIRED INFECTIONS |                  |
| AMR Related Mortalities       |                  |

### 8. Microbiology Laboratory Results/Report Section

#### 8.1. Laboratory Findings

| Tests            | Results | Tests                | Results |
|------------------|---------|----------------------|---------|
| Appearance       |         | Gram stain           |         |
| Bilirubin        |         | ZN stain             |         |
| Glucose          |         | Wet prep             |         |
| Ketones          |         | Modified ZN          |         |
| Lymphocytes      |         | Differential         |         |
| Nitrite          |         | Crag                 |         |
| PH               |         | Neutrophils          |         |
| Protein          |         | RBC count            |         |
| Red blood cells  |         | Total protein        |         |
| Specific gravity |         | India ink            |         |
| Urobilinogen     |         | WBC count            |         |
| Leukocytes       |         | Cell Differential    |         |
| KOH              |         | Reducing sugars      |         |
| Microscopy       |         | Quantitative culture |         |
| MRSA screening   |         | Serum Crag           |         |
| HIV Serology     |         | Total cell count     |         |

#### Culture and Sensitivity Results:

|  |
|--|
|  |
|--|

| # | Antibiotic type( <i>to be linked to the type of Microorganism</i> ) | Organism 1<br>( <i>indicate organism name here</i> ) |  | Organism 2<br>( <i>indicate organism name here</i> ) |  | Organism 3<br>( <i>indicate organism name here</i> ) |  |
|---|---------------------------------------------------------------------|------------------------------------------------------|--|------------------------------------------------------|--|------------------------------------------------------|--|
| 1 |                                                                     |                                                      |  |                                                      |  |                                                      |  |
| 2 |                                                                     |                                                      |  |                                                      |  |                                                      |  |
| 3 |                                                                     |                                                      |  |                                                      |  |                                                      |  |
| 4 |                                                                     |                                                      |  |                                                      |  |                                                      |  |
| 5 |                                                                     |                                                      |  |                                                      |  |                                                      |  |
| 6 |                                                                     |                                                      |  |                                                      |  |                                                      |  |

|    |  |  |  |  |  |  |  |
|----|--|--|--|--|--|--|--|
| 7  |  |  |  |  |  |  |  |
| 8  |  |  |  |  |  |  |  |
| 9  |  |  |  |  |  |  |  |
| 10 |  |  |  |  |  |  |  |
| 11 |  |  |  |  |  |  |  |
| 12 |  |  |  |  |  |  |  |
| 13 |  |  |  |  |  |  |  |
| 14 |  |  |  |  |  |  |  |
| 15 |  |  |  |  |  |  |  |
| 16 |  |  |  |  |  |  |  |
| 17 |  |  |  |  |  |  |  |
| 18 |  |  |  |  |  |  |  |
| 19 |  |  |  |  |  |  |  |
| 20 |  |  |  |  |  |  |  |
| 21 |  |  |  |  |  |  |  |

Results Guide      S – Sensitive      R – Resistant      I – Intermediate

**12. Test/Analysis Performed by:**

|                          |                         |                       |                                             |
|--------------------------|-------------------------|-----------------------|---------------------------------------------|
| Surname Name of officer: | Other Names of Officer: | Signature of officer: | Result dispatching date:<br><i>DD/MM/YY</i> |
|--------------------------|-------------------------|-----------------------|---------------------------------------------|

**13. Review Comment (s) on findings:**

|              |
|--------------|
| Reviewed by: |
|--------------|
